# Supplementary material for: Determination of fluoroquinolones in foods using ionic liquid modified Fe3O4/MWCNTs as the adsorbent for magnetic solid phase extraction coupled with HPLC
Source: Royal Society of Chemistry journal article supplement (doi:10.1039/d0ay01045f), 2020-01-01
Supplement: d0ay01045f1.pdf [file d0ay01045f1.pdf]

## Supplementary Information

### **Determination of fluoroquinolones in foods using ionic liquid modified Fe<sub>3</sub>O<sub>4</sub>/MWCNTs as the adsorbent for magnetic solid phase extraction coupled with HPLC**

Meng Zhang<sup>1</sup>, Jie Chen<sup>1,2</sup>, Faqiong Zhao<sup>1\*</sup>, Baizhao Zeng<sup>1</sup>

<sup>1</sup> College of Chemistry and Molecular Sciences, Wuhan University, Wuhan 430072, P.R. China

<sup>2</sup> Department of Food Engineering, ZhiXing College of Hubei University, Wuhan 430011, P.R. China

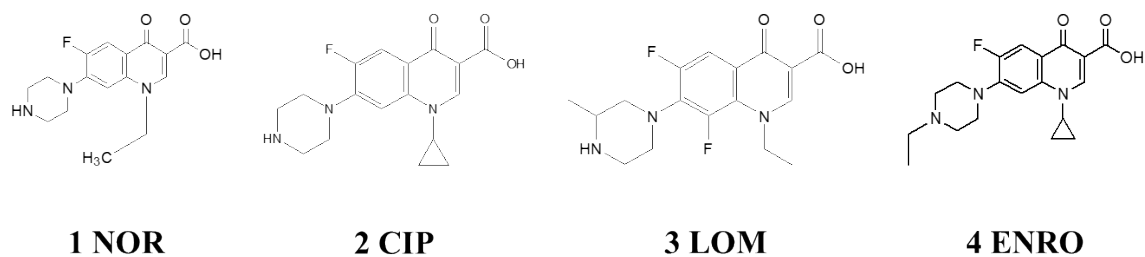

Figure S1 Structures of the studied FQs. 1, norfloxacin (NOR); 2, ciprofloxacin (CIP); 3, lomefloxacin (LOM); 4, enrofloxacin (ENRO)

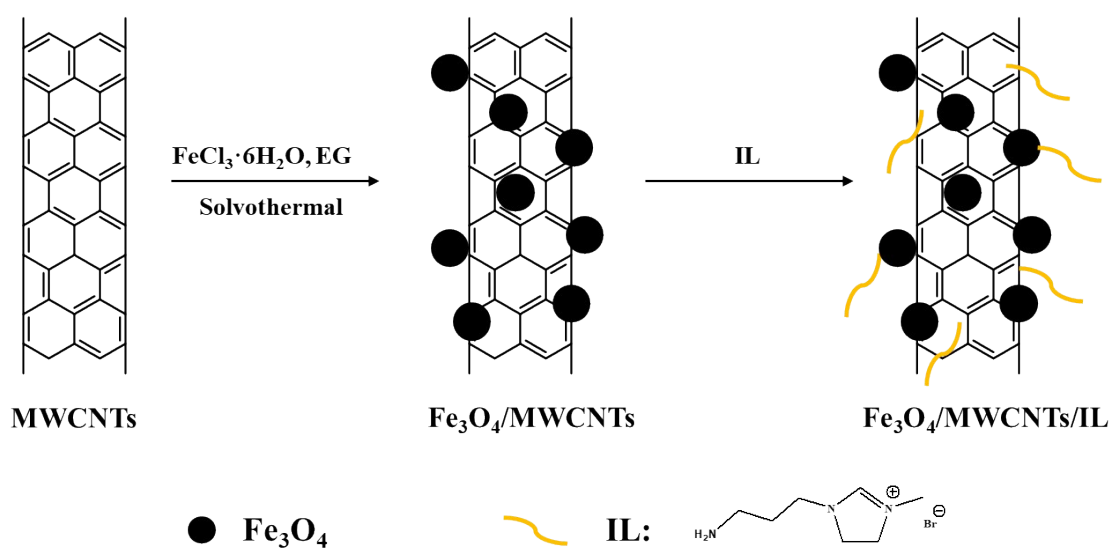

Scheme. S1 Schematic of the synthesis of Fe<sub>3</sub>O<sub>4</sub>/MWCNTs/IL

Table S1 pK<sub>a</sub> values of FQs and retention time in the HPLC

| Compound | pK <sub>a</sub> | Retention time(min) |
|----------|-----------------|---------------------|
| NOR      | 6.22, 8.38      | 8.25                |
| CIP      | 6.68, 8.63      | 9.22                |
| LOM      | 6.56, 8.47      | 10.81               |
| ENRO     | 6.68, 7.87      | 12.74               |
